# Supplementary material
Source: PubMed Central journal article supplement (PMC3911190)
Supplement: AEM.03352-13_zam999105109so1.pdf [file AEM.03352-13_zam999105109so1.pdf]

## **Supplemental materials labels**

**Supplemental Video 1.** Close-up detail of dividing Rb[MCS]. These rickettsiae

demonstrate erratic movement due to competing actin-based motility.

Upon separation, the bacteria begin to behave normally

**Supplemental Video 2.** A representative sample of Rb[RmRickA] in a Vero cell

4 h.p.i. at 23 °C.

**Supplemental Video 3.** An example of Rb[MCS] moving in a Vero host cell 16

h.p.i. at 23 °C.
